# Supplementary material for: Does a facultative mutualism limit species range expansion?
Source: Springer Nature journal article supplement (doi:10.1007/s00442-011-1958-4), 2011-03-06

**Online Resource 1 for**

**“Does a facultative mutualism limit species range expansion?”**

**John Stanton-Geddesand Carolyn Anderson**

This document contains three additional figures and one additional table.

- Figure S1 is a map of the sites and seed sources referred to in the paper.
- Figure S2 replicates Figure 2 in the paper, but with all five rhizobia inocula that were tested in the experiment included.
- Table S1 replicates Table 2 in the paper, but with all five rhizobia inocula that were tested in the experiment included.
- Figure S3 shows the number of nodules on plants with each rhizobia inoculum.

**Fig. S1** Map of source locations for *C. fasciculata* seed (gray circles) and transplant sites (black triangles) where the field experiment was performed and rhizobia were trapped. Rhizobia were also collected from plants at the TYS sites for the greenhouse experiment. The black line is the approximate range edge of *C. fasciculata* based on USDA Plants Database (plants.usda.gov) county level information. Plant populations are: GCD, Grey Cloud Dunes Scientific and Natural Area (44°47’19N 92°57’29W), Minnesota Department of Natural Resources, Cottage Grove, Minnesota; CERA, Conard Environmental Research Area of Grinnell College (41°41’14N, 92°52’16W), Kellogg, Iowa; TYS, Tyson Research Station annex of Washington University (38°25’31N 90°40’58W), St. Louis, Missouri; KPBS, Konza Prairie Biological Station at Kansas State University (39°07’07N, 96°32’15W), Manhattan, Kansas. Transplant sites are: ACNW: Audubon Center of the Northwoods (46°06’41N 92°59’34W), Sandstone, Minnesota; SCWRS: St. Croix Watershed Research Station (45°10’42N 92°45’53W, Marine – on – St. Croix, Minnesota; CERA (same as above); RNHA, Reller Natural History Area of University of Nebraska – Lincoln (40°35’48N 96°45’41W), Sprague, Nebraska; CPBS, Cedar Point Biological Station of UN – Lincoln (41°11’34N 101°38’57W), Ogallala, Nebraska. The map was made using DIVA-GIS (www.diva-gis.org).


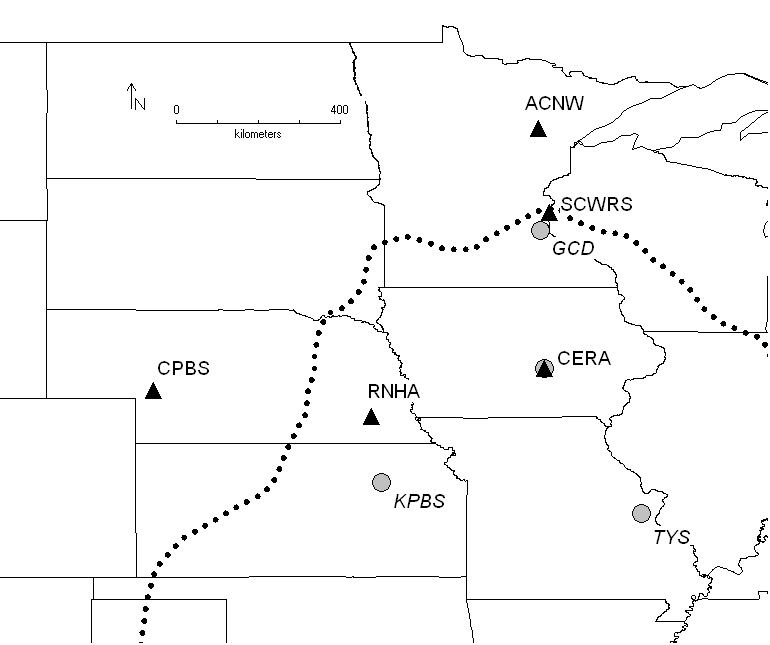


**Table S1**  This table is the same as Table 2 in the paper, but includes all 5 rhizobia inocula and the control in the “Rhizobia” term. Two of these inocula (rCERA, rRNHA) were not included in the analysis presented in the paper because they did not produce any more nodules than control.

**Change in plant height Nodule number**

**Source df SS F value P > F df SS F value P > F**

Block 2 360.3 3.5 0.07 2 15.2 8.4 0.007

Rhizobia 5 5890.5 22.7 < 0.0001 5 316.8 70.3 < 0.0001

*Rhiz x Block 10 518.9 - - 9 9.0 - -*

Date planted 11 989.4 2.3 0.01 - - - -

Plant x Rhiz 15 479.0 0.8 0.68 15 1.63 0.6 0.89

Plant pop 3 492.6 4.1 0.007 3 0.68 1.19 0.32

*Residuals 192 8427.6 - - 203 38.85 - -*

**Fig. S2** Estimated mean values (± SE) of change in height for plants grown in the greenhouse with one of five rhizobia inocula or control, including the two inocula (Interior2 and W.Edge) not included in Figure 2 in the text as they did not produce significantly more nodules than control. The x-axis gives the rhizobia inoculum source location: Interior 1, TYS; Interior 2, CERA; W.Edge, RNHA; N.Edge, SCWRS; Beyond.N, ACNW.


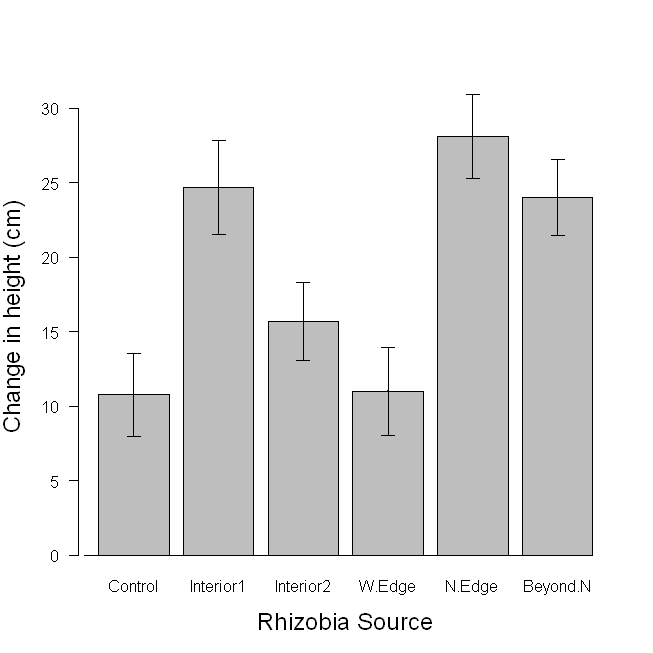


**Fig. S3** Estimated mean values (± SE) of nodule number on plants grown in the greenhouse with five rhizobia inocula and a control. Rhizobia inoculum source location is given in Figure S2.


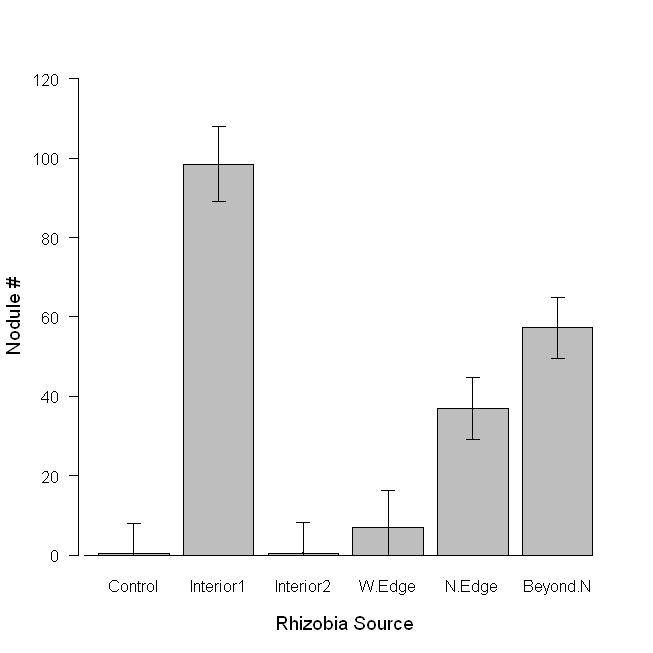

Supplement: MOESM1 [file 442_2011_1958_MOESM1_ESM.doc]
